# Supplementary material for: Nanofiller-Enhanced Soft Non-Gelatin Alginate Capsules for Modified Drug Delivery
Source: MDPI journal article supplement (doi:10.3390/ph14040355), 2021-04-13
Supplement: s1 [file s1]

## Supplementary Information

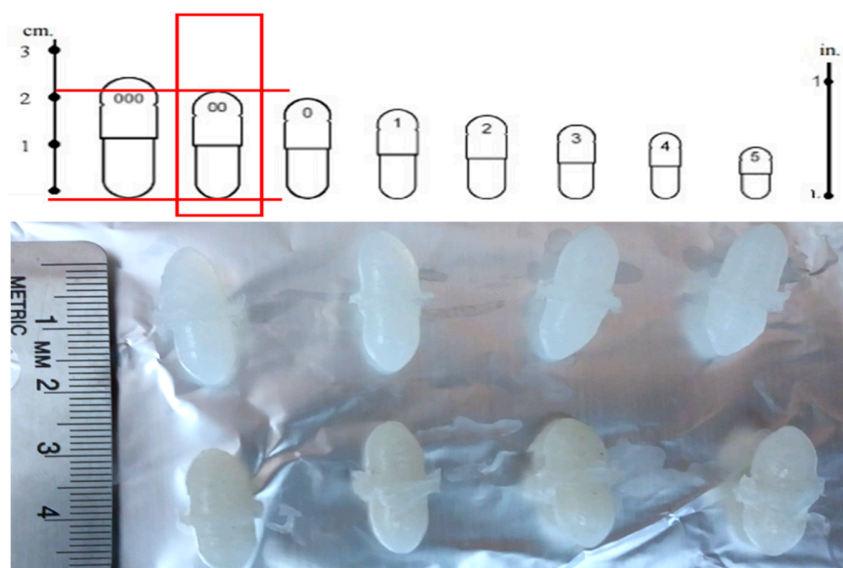

**Figure S1** Appearance of the alginate capsule. A red window indicates the alginate capsule is size '00,' and a ring formation observed at the middle of the oval capsule.

a)

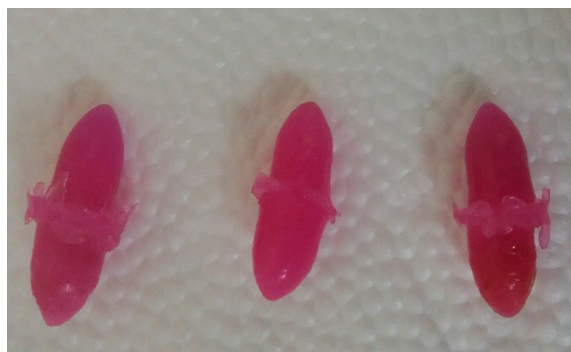

b)

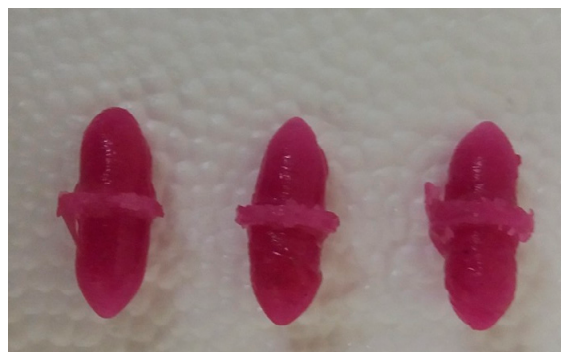

**Figure S2** Dil-C (Fluorescent dye encapsulated capsules). a) Alginate capsules with Dil-C dye. b) Alginate-MMT capsules with Dil-C dye. The Capsules with MMT looks intact compared to one without MMT.
